# Supplementary material for: Dihydroorotate dehydrogenase regulates ferroptosis in neurons after spinal cord injury via the P53‐ALOX15 signaling pathway
Source: PubMed Central journal article supplement (PMC10324365; doi:10.1111/cns.14150), 2023-03-21
Supplement: CNS-29-1923-s002.pdf [file CNS-29-1923-s002.pdf]

Figure S1

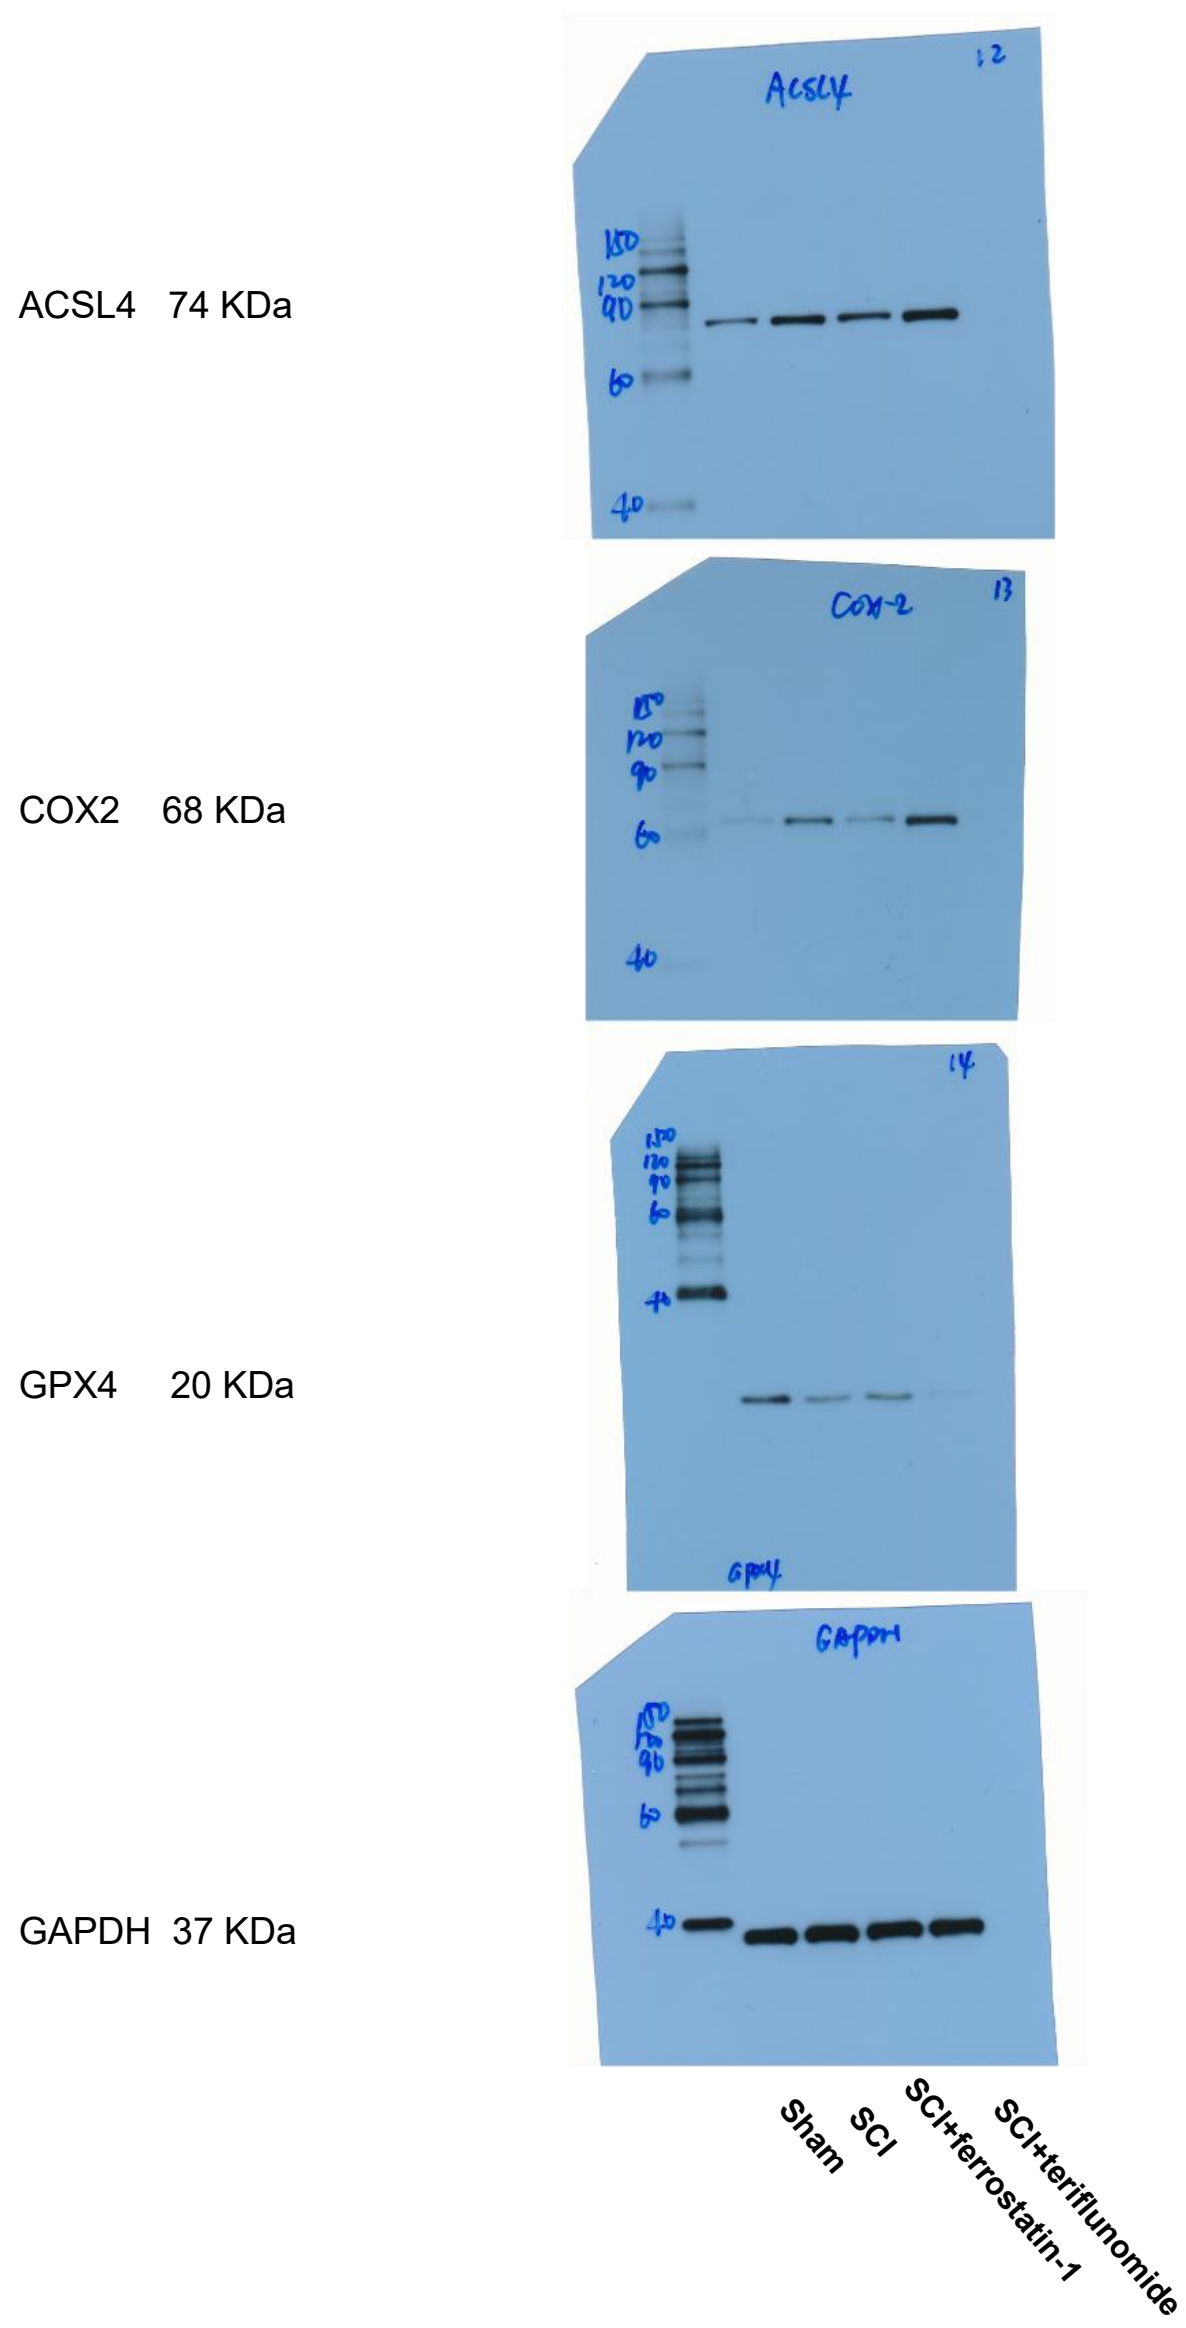

Figure S1: Full unedited gel/blot for Figure 2a.

Figure S2

(A)

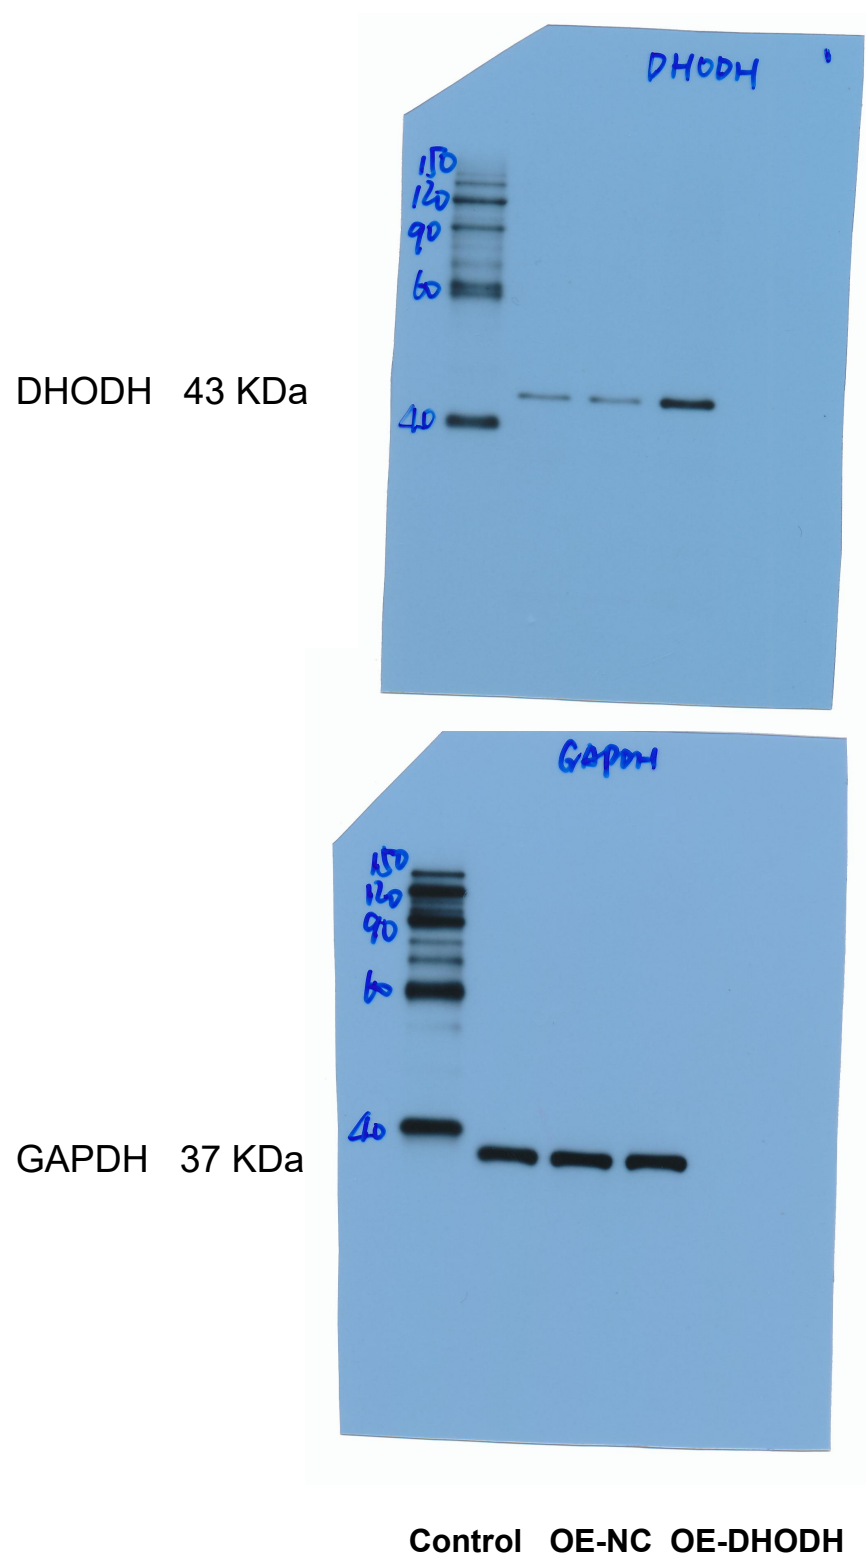

(B)

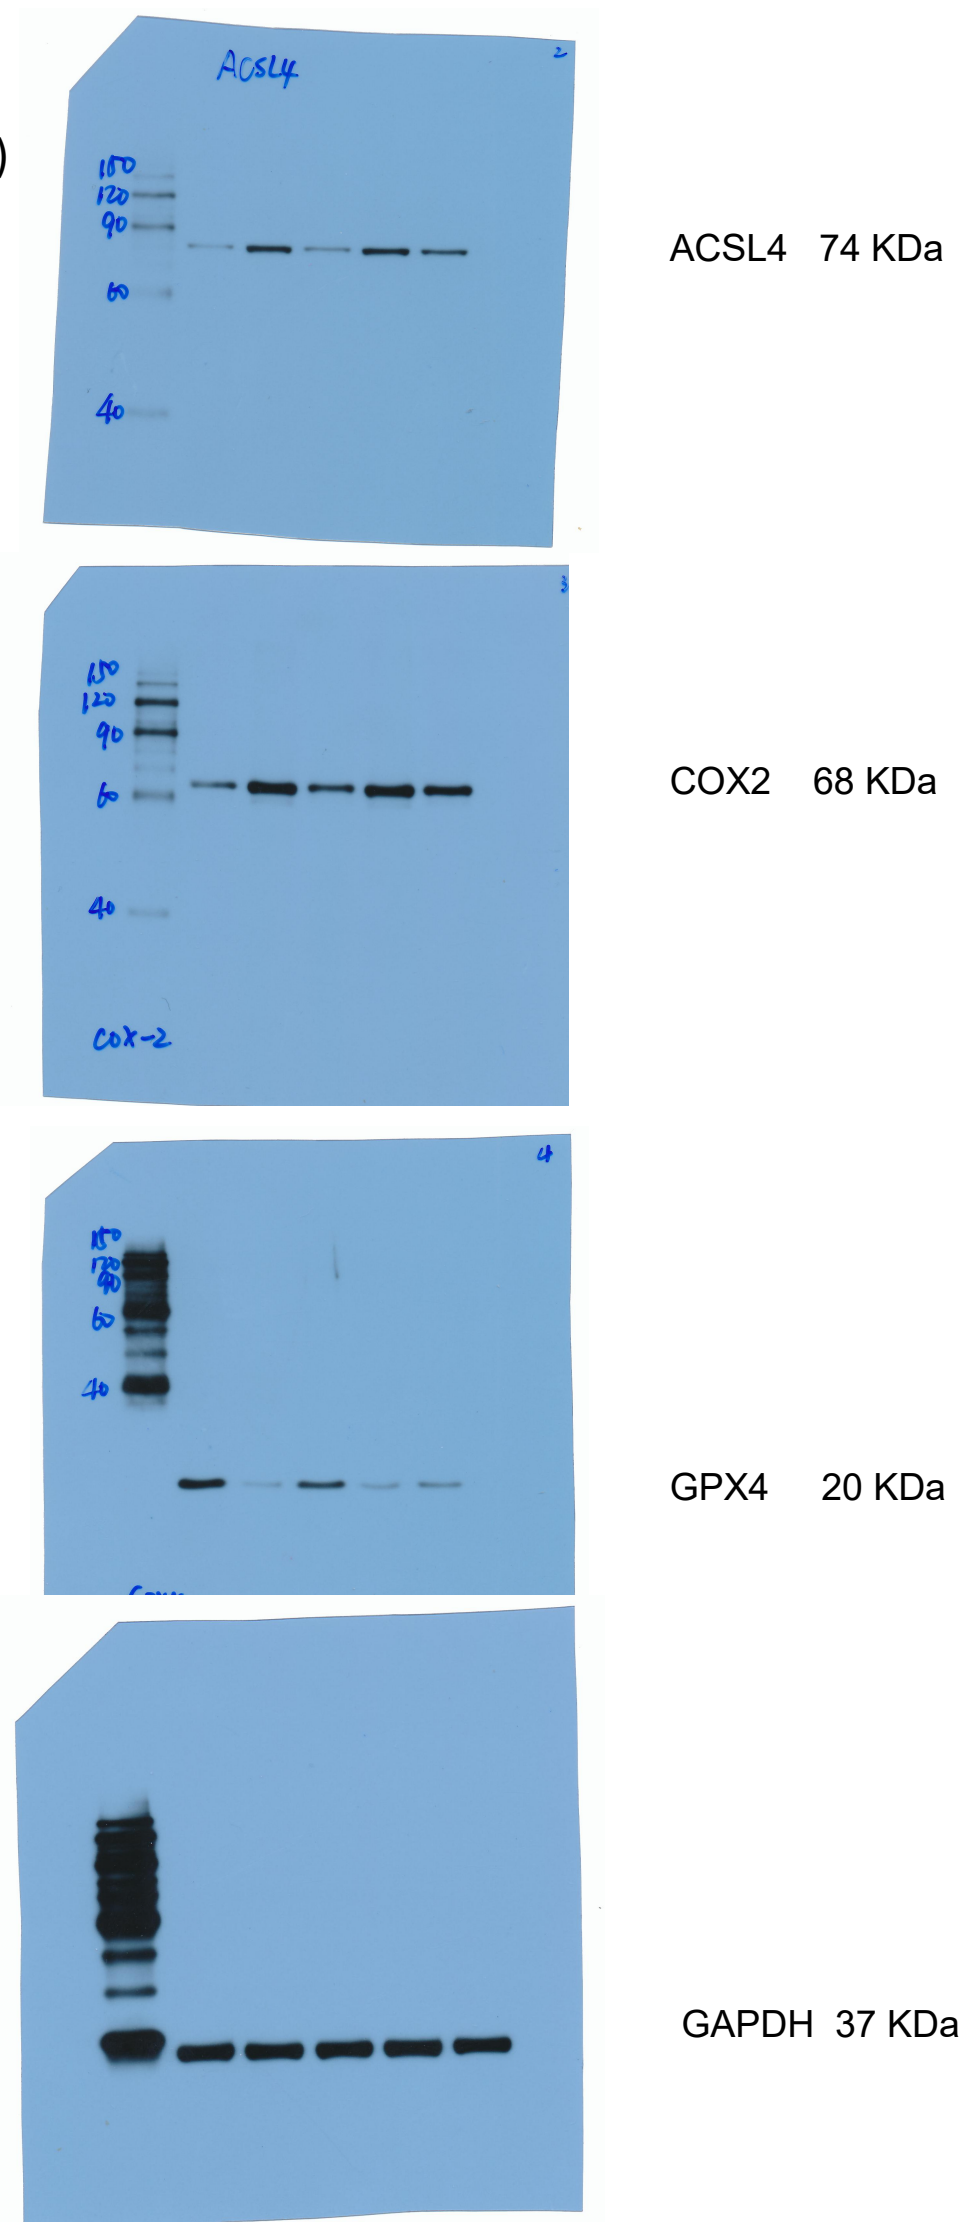

|               |   |   |   |   |   |
|---------------|---|---|---|---|---|
| Erastin       | - | + | + | + | + |
| ferrostatin-1 | - | - | + | - | - |
| OE-NC         | - | - | - | + | - |
| OE-DHODH      | - | - | - | - | + |

Figure S2 (A): Full unedited gel/blot for Figure 3a.  
 Figure S2 (B): Full unedited gel/blot for Figure 3b.

Figure S3

(A)

p53 53 KDa

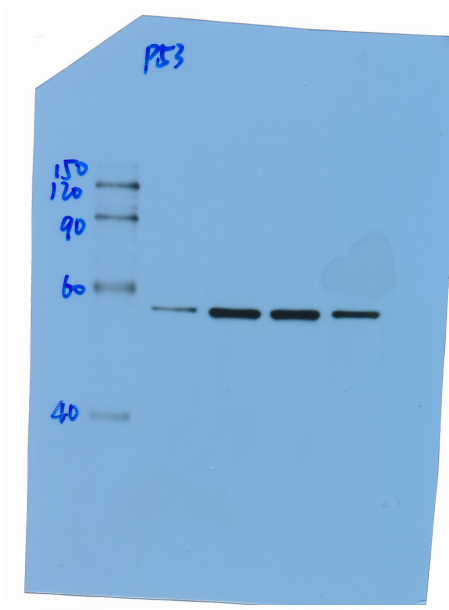

GAPDH 37 KDa

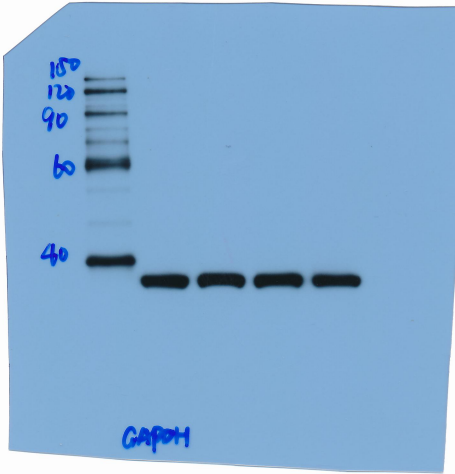

|          |   |   |   |   |
|----------|---|---|---|---|
| Erastin  | - | + | + | + |
| OE-NC    | - | - | + | - |
| OE-DHODH | - | - | - | + |

(B)

p53 53 KDa

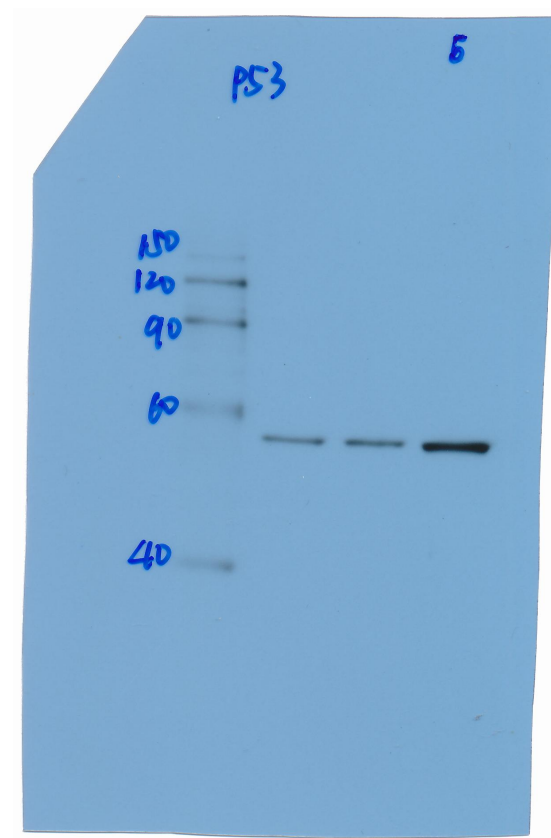

GAPDH 37 KDa

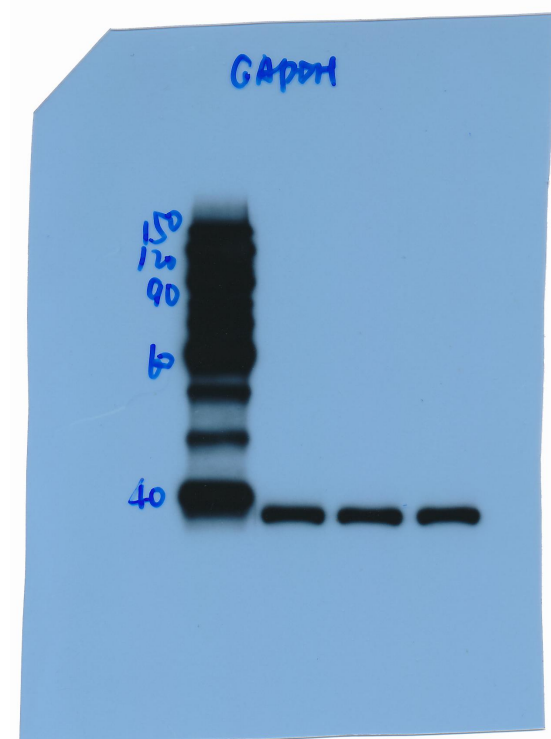

Control OE-NC OE-p53

Figure 4

(C)

GPX4 20 KDa

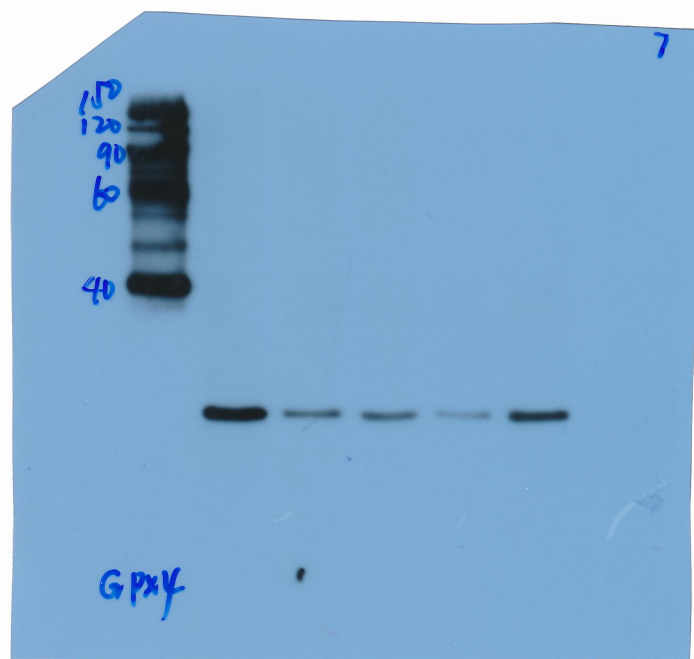

GAPDH 37 KDa

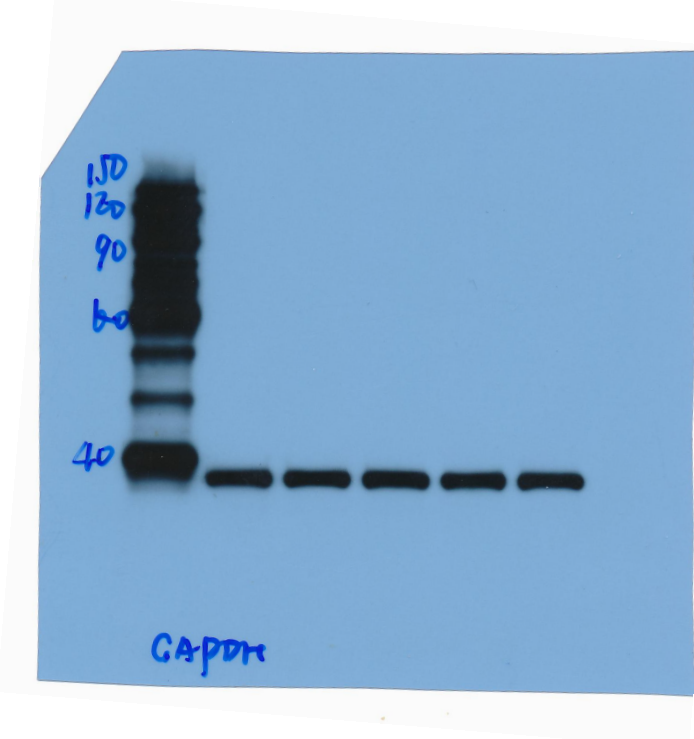

|          |   |   |   |   |   |
|----------|---|---|---|---|---|
| Erastin  | - | + | + | + | + |
| OE-NC    | - | - | + | - | - |
| OE-p53   | - | - | - | + | + |
| OE-DHODH | - | - | - | - | + |

Figure S3 (A): Full unedited gel/blot for Figure 4a.  
 Figure S3 (B): Full unedited gel/blot for Figure 4d.  
 Figure S3 (C): Full unedited gel/blot for Figure 4e.

Figure S4

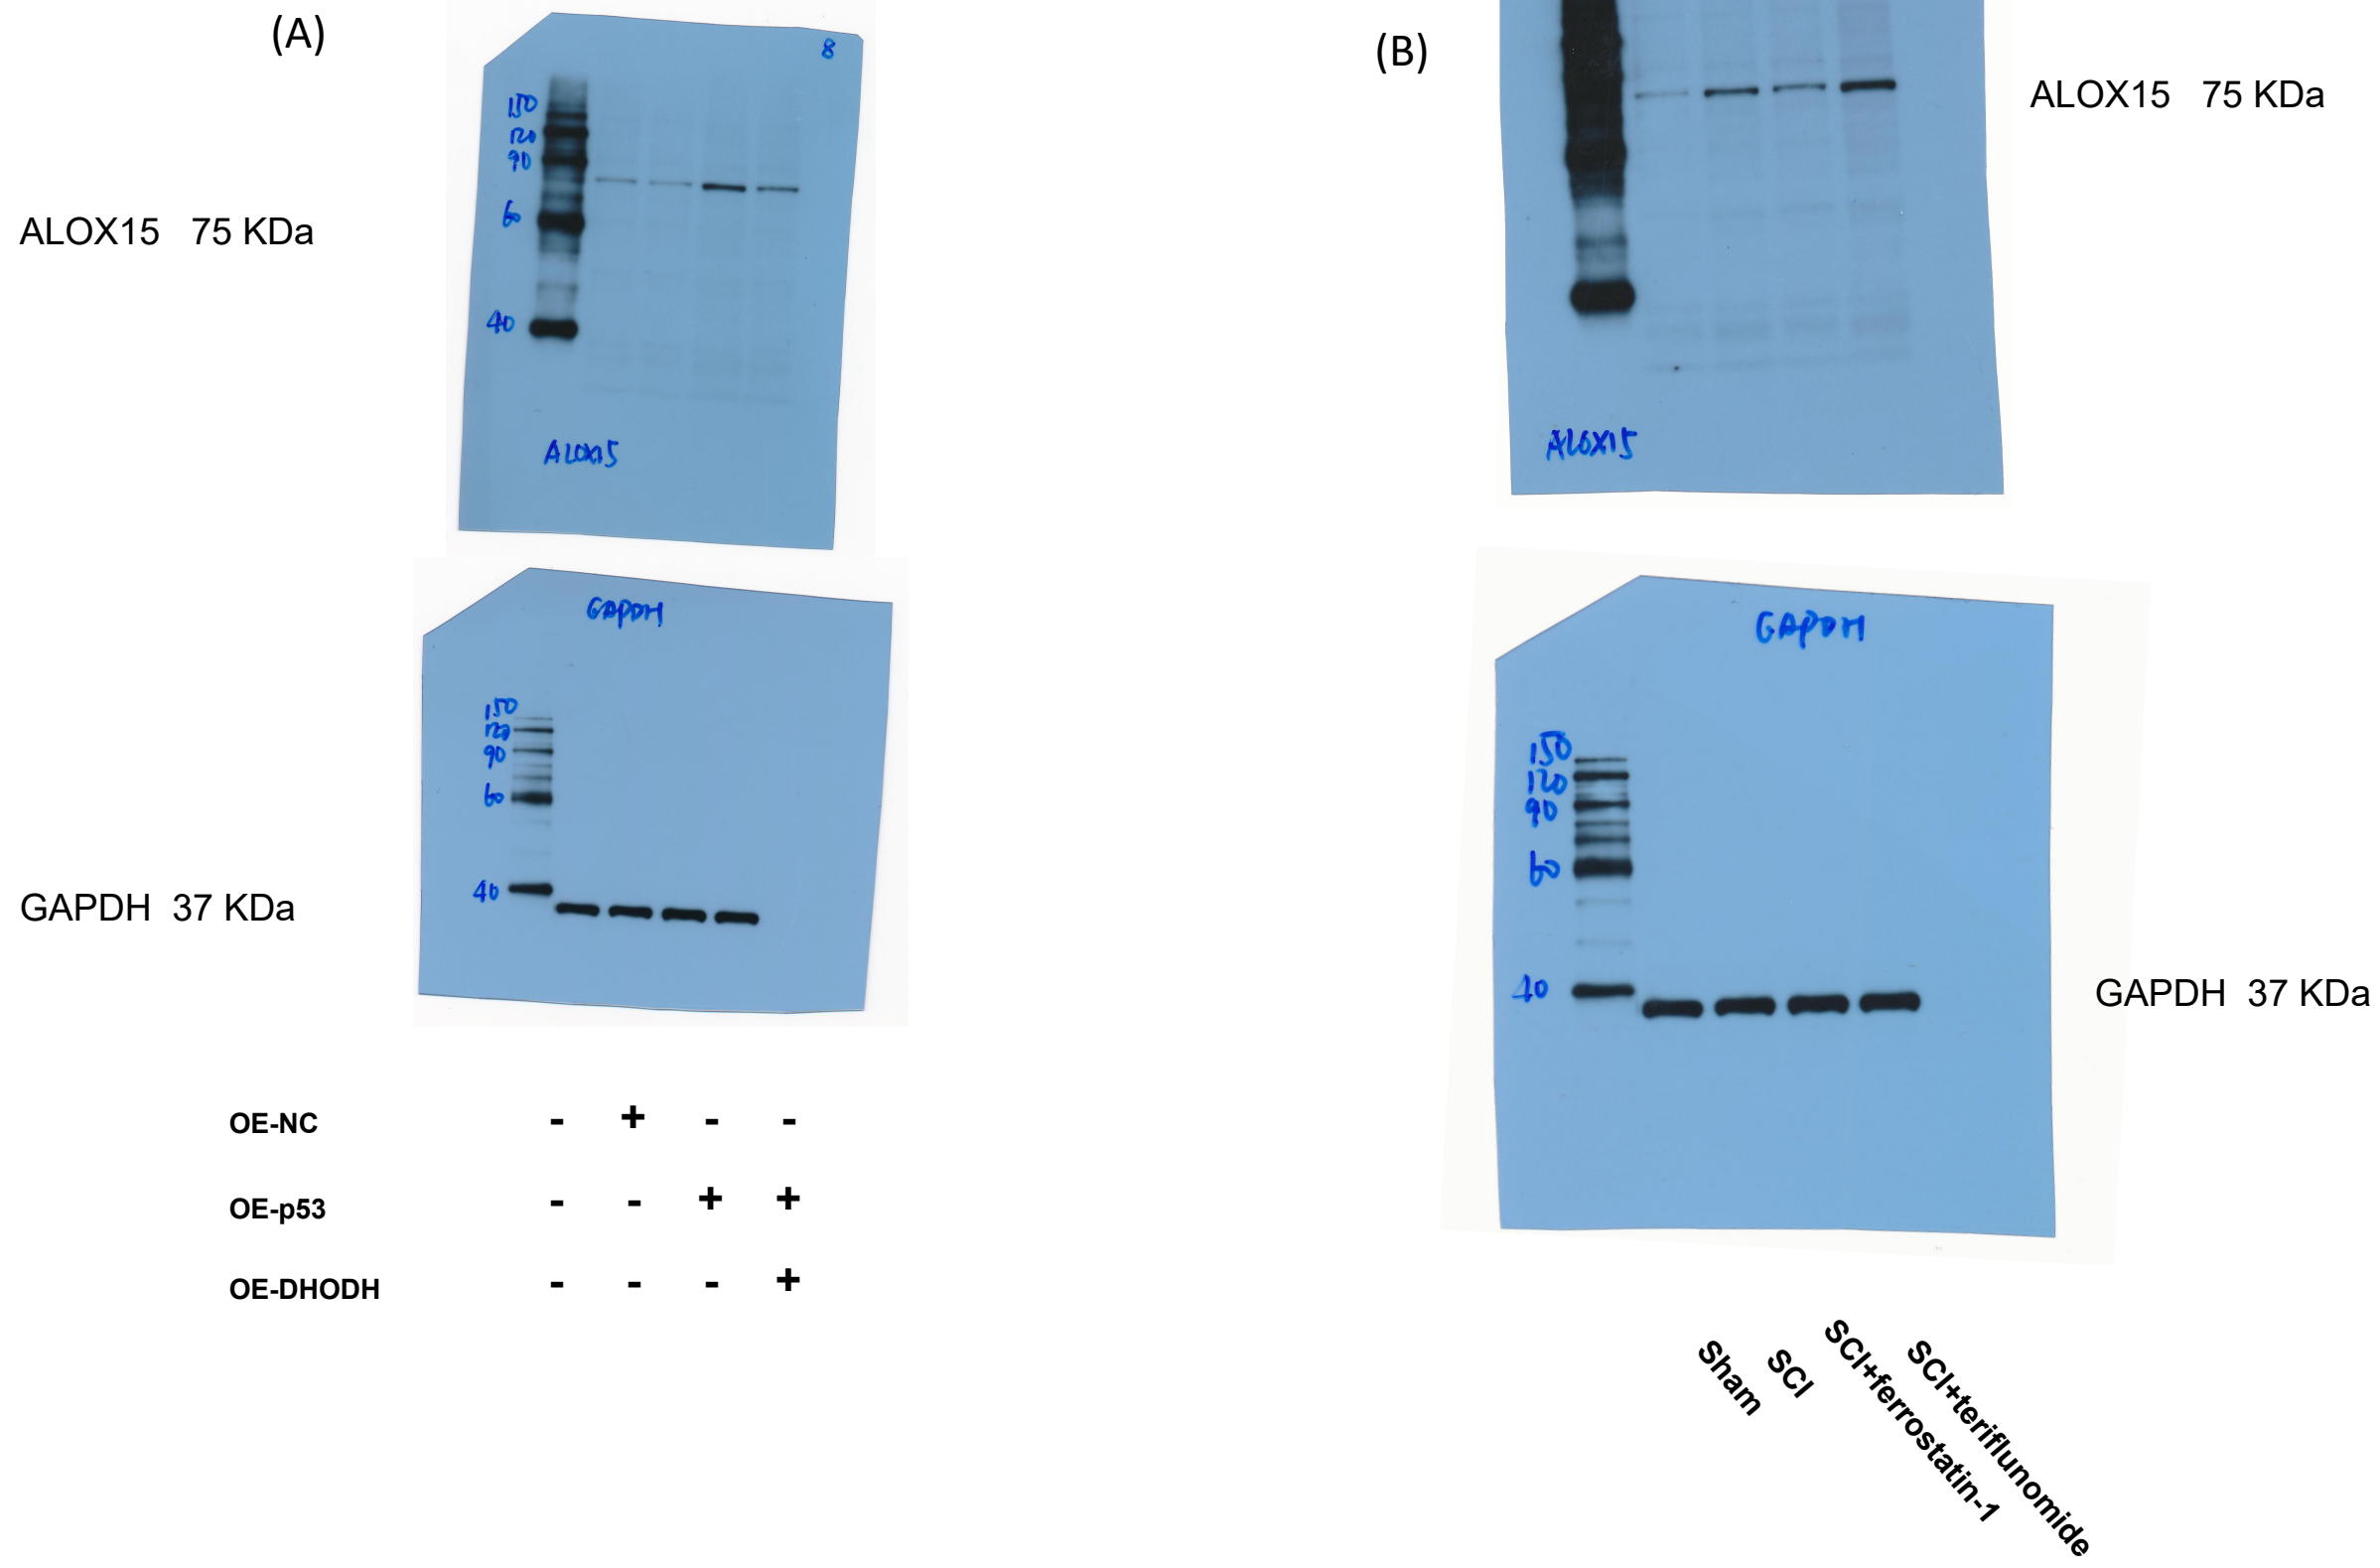

Figure S4 (A): Full unedited gel/blot for Figure 5a.  
Figure S4 (B): Full unedited gel/blot for Figure 5d

Figure S5

(A)

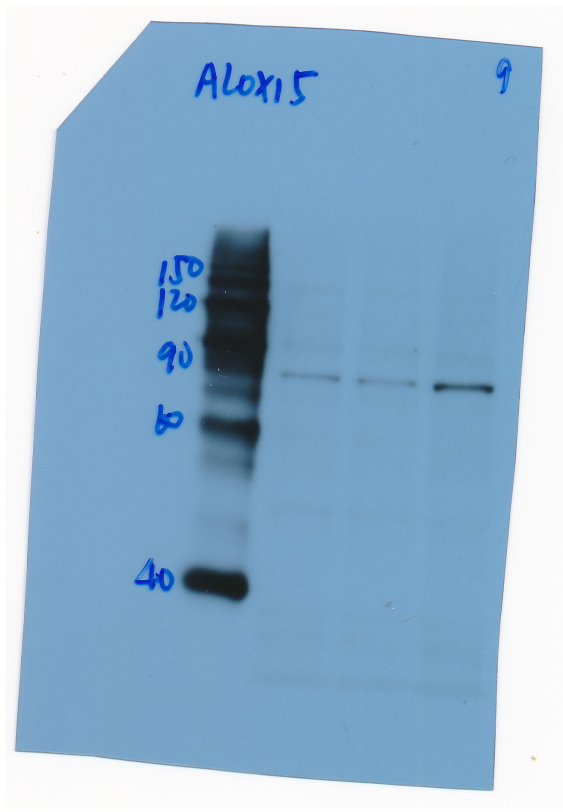

ALOX15 75 KDa

(B)

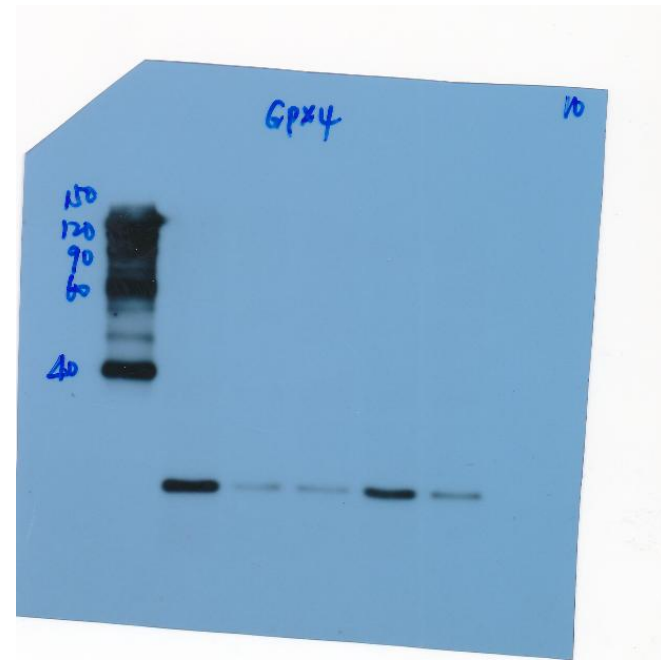

GPX4 20 KDa

GAPDH 37 KDa

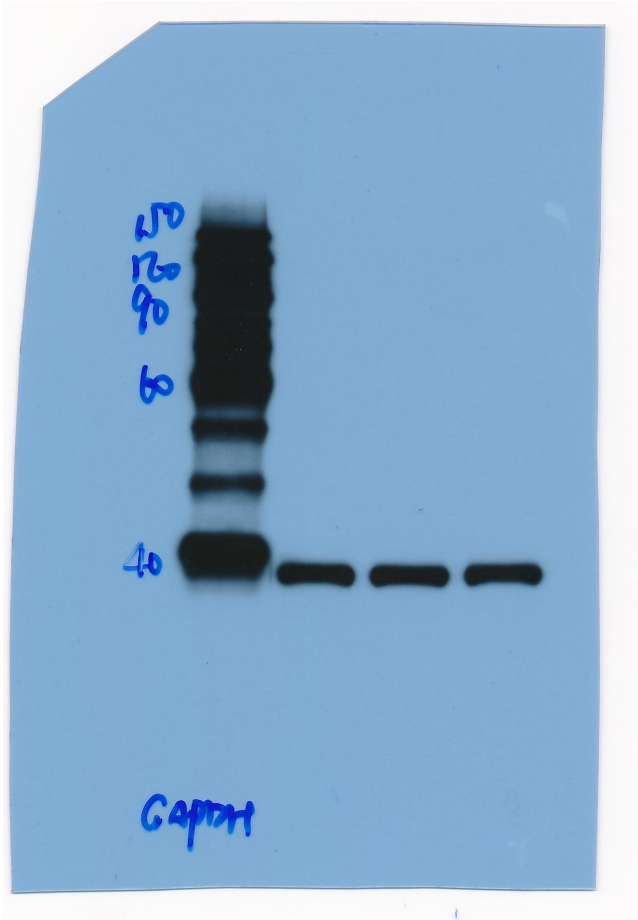

Control OE-NC OE-ALOX15

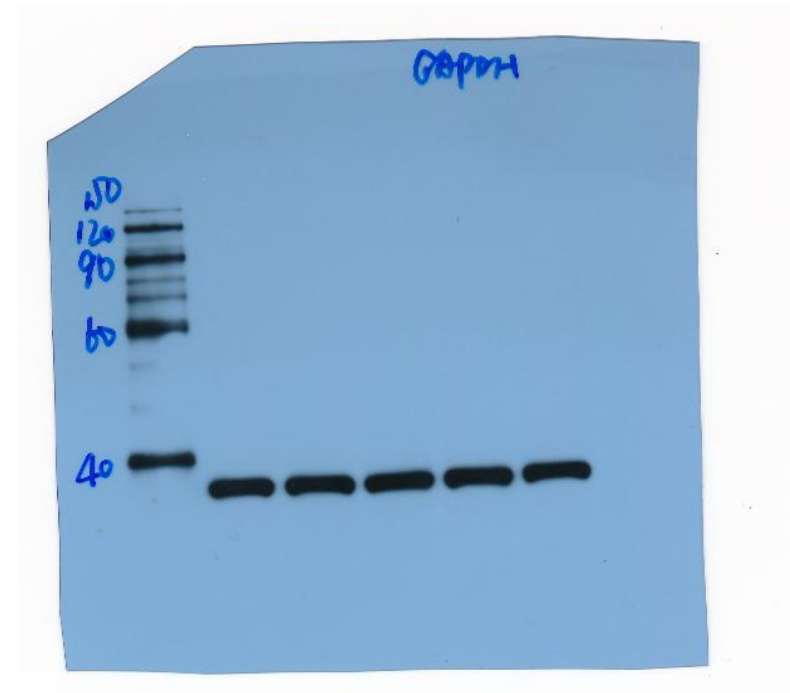

GAPDH 37 KDa

|           |   |   |   |   |   |
|-----------|---|---|---|---|---|
| Erastin   | - | + | + | + | + |
| OE-NC     | - | - | + | - | - |
| OE-DHODH  | - | - | - | + | + |
| OE-ALOX15 | - | - | - | - | + |

(C)

GPX4 20 KDa

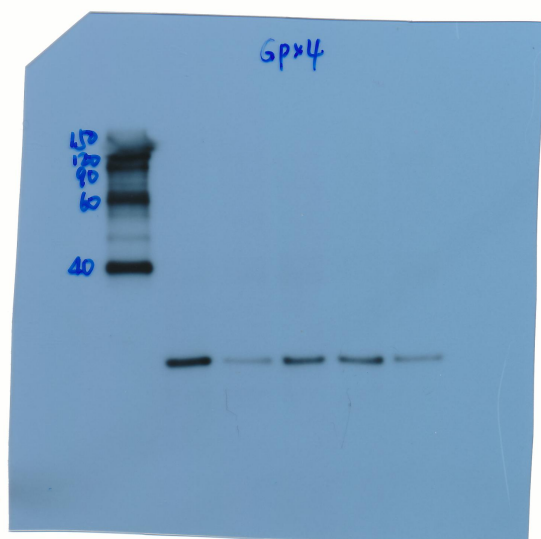

GAPDH 37 KDa

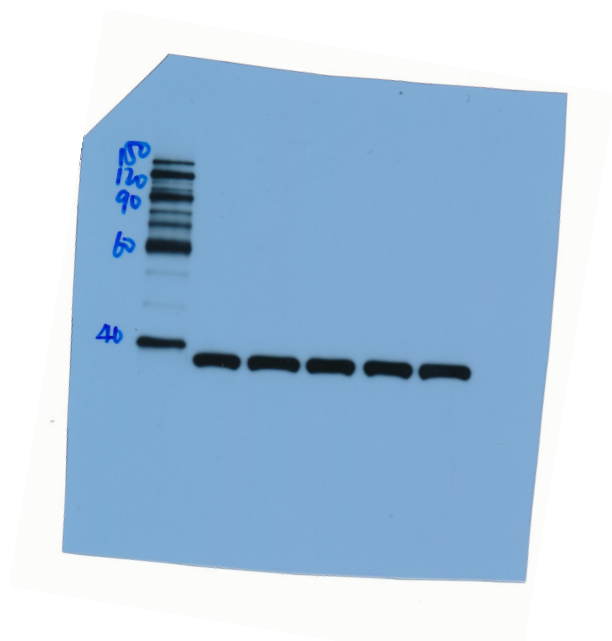

|           |   |   |   |   |   |
|-----------|---|---|---|---|---|
| Erastin   | - | + | + | + | + |
| PFT-α     | - | - | + | + | + |
| OE-NC     | - | - | - | + | - |
| OE-ALOX15 | - | - | - | - | + |

Figure S5 (A): Full unedited gel/blot for Figure 6a.

Figure S5 (B): Full unedited gel/blot for Figure 4c.

Figure S5 (C): Full unedited gel/blot for Figure 6h.
